# Supplementary material for: Fatty acid mobilization from adipose tissue is mediated by CD36 posttranslational modifications and intracellular trafficking
Source: JCI journal article supplement (doi:10.1172/jci.insight.147057), 2021-07-27
Supplement: sd1 [file 1]

You are being redirected.
